# Supplementary material for: Association of nicotinamide-N-methyltransferase mRNA expression in human adipose tissue and the plasma concentration of its product, 1-methylnicotinamide, with insulin resistance
Source: PubMed Central journal article supplement (PMC4351435; doi:10.1007/s00125-014-3490-7), 2015-01-18

**ESM Fig. 1.** Relationship between MNA concentrations and *NNMT* expression in adipose tissue dependent on BMI for the cross-sectional cohort. Data were  $\log_{10}$ -transformed to achieve normal distribution. *a,b*, omental adipose tissue; *c,d*, subcutaneous adipose tissue. Circles: Individuals with BMI<39 ( $n=99$ ). Triangles: Individuals with BMI>39 ( $n=99$ ). \* $p<0.05$ , \*\*\* $p<0.001$ .

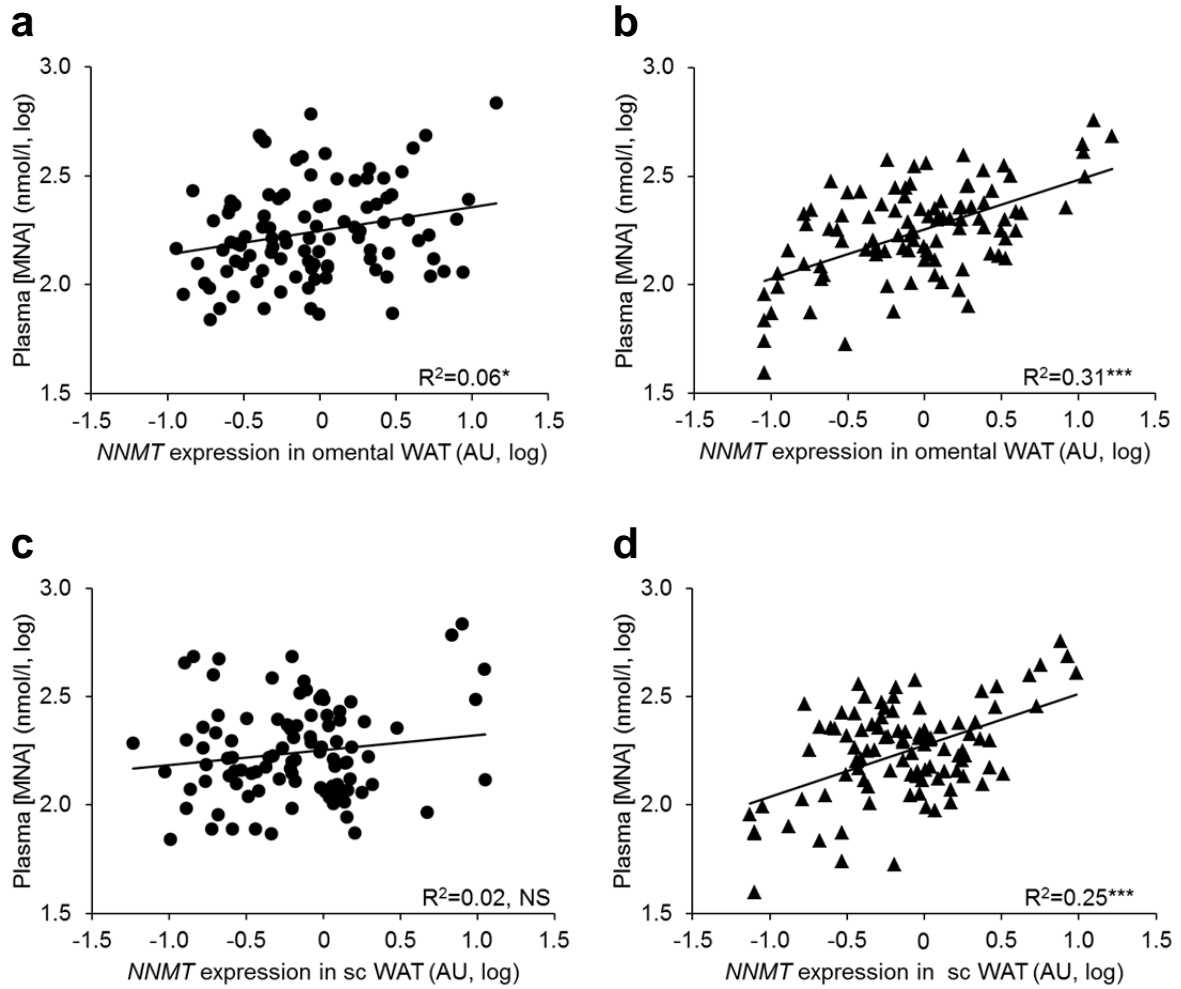

Supplement: 125_2014_3490_MOESM2_ESM.pdf [file 125_2014_3490_MOESM2_ESM.pdf]
