# Supplementary material for: Association of nicotinamide-N-methyltransferase mRNA expression in human adipose tissue and the plasma concentration of its product, 1-methylnicotinamide, with insulin resistance
Source: PubMed Central journal article supplement (PMC4351435; doi:10.1007/s00125-014-3490-7), 2015-01-18

**ESM Fig. 2.** Negative correlation between glucose infusion rate and *NNMT* expression in subcutaneous adipose tissue in insulin-resistant individuals ( $n=32$ ). \* $p<0.05$

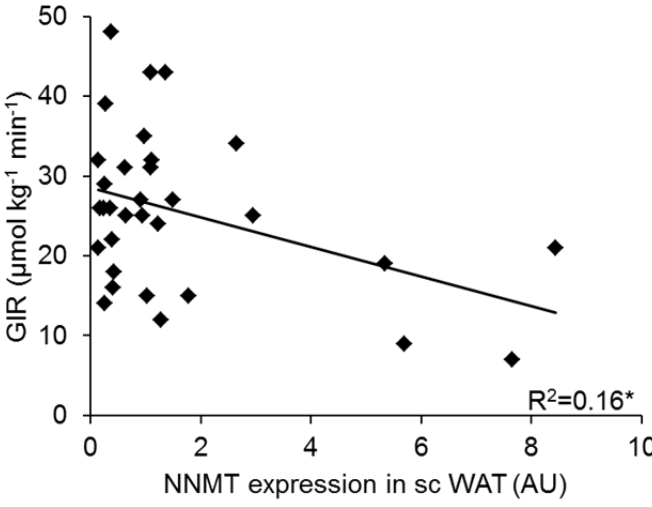

Supplement: 125_2014_3490_MOESM3_ESM.pdf [file 125_2014_3490_MOESM3_ESM.pdf]
